1 Full title: **‘If you find that I am HIV Positive, Don't Tell me’:**  
2 **Exploring the barriers and recommendations for HIV Prevention**  
3 **services utilization among youth in rural southwestern Uganda**

4 Short title: **HIV prevention service utilization among youth**

5 Paul Waswa Ssali<sup>1</sup>, Timothy Mwanje Kintu<sup>1</sup>, Immaculate Karungi<sup>1</sup>, Agnes Kisakye  
6 Namuyaba<sup>1</sup>, Tonny Kyagambiddwa<sup>1</sup>, Ruth Namaseruka<sup>1</sup>, Mark Agaba<sup>1</sup>, Celestino Obua<sup>1,2</sup>,  
7 Edith K Wakida<sup>2,3</sup>, Jerome Kahuma Kabakyenga<sup>4\*</sup>

8

9 <sup>1</sup>Faculty of Medicine, Mbarara University of Science and Technology, Mbarara, Uganda;

10 <sup>2</sup>Office of Research Administration, Mbarara University of Science and Technology;

11 <sup>3</sup>Department of Medical Education, California University of Science and Medicine, San  
12 Bernardino, USA;

13 <sup>4</sup>Department of community Health, Mbarara University of Science and Technology, Mbarara,  
14 Uganda

15 Correspondence: Jerome Kahuma Kabakyenga

16 P.O. Box 1410, Mbarara, Uganda

17 Tel +256772590409

18 Email: [jkabakyenga@must.ac.ug](mailto:jkabakyenga@must.ac.ug)

19

20

21

22

23

24

NOTE: This preprint reports new research that has not been certified by peer review and should not be used to guide clinical practice.

25 **Abstract**

26 **Background:** Globally, the majority of new HIV infections are recorded in Eastern and  
27 Southern Africa, with the youth being disproportionately affected. HIV prevention is the  
28 cornerstone of controlling the spread of HIV and ending this epidemic by 2030. However,  
29 barriers to the utilization of HIV prevention services have not been extensively explored among  
30 the youth in rural settings in sub-Saharan Africa. This study explored these barriers and  
31 identified recommendations to improve the utilization of HIV prevention methods among  
32 youth in rural southwestern Uganda.

33 **Methods:** This was a qualitative study done in the Rubirizi district in southwestern Uganda  
34 between February and April 2022. We conducted six Focus Group Discussions (with youth  
35 [15-24 years] both in and out of school), nine in-depth interviews (with teachers, health  
36 workers, and members of the village health team), and four key informant interviews (with  
37 district officials) to collect data. Thematic analysis was done to identify the barriers to and  
38 establish recommendations for the utilization of HIV prevention services from the study  
39 participants. Both deductive and inductive approaches were used during the analysis.

40 **Results:** The identified barriers were categorized into individual barriers (ignorance and  
41 misconceptions about the services, fear of testing, low perceived susceptibility to HIV, and fear  
42 of breach of confidentiality), community barriers (lack of counseling services in the  
43 communities, peer influence, and stigma towards HIV), and a health system barrier (lack of  
44 youth-friendly services). Three main recommendations were established including the  
45 formation of youth peer support groups, ongoing awareness campaigns, and socio-economic  
46 empowerment.

47 **Conclusion:** There's a need for national scaling of awareness campaigns and sexual and  
48 reproductive health services, such as youth peer support services to address most of the

49 identified barriers. Additionally, economic empowerment especially among adolescent girls  
50 and young women has enormous potential to address the spread of HIV in this sub-population.

51

52 **Keywords:** HIV prevention, sexual and reproductive health, youth, barriers

53

## 54 **Introduction**

55 Sub-Saharan Africa accounts for an estimated 69% of People Living with HIV (PLWH) and  
56 an estimated 70% of AIDS-related deaths globally (1). In 2021, the majority of the new HIV  
57 infections (44%) occurring worldwide were recorded in eastern and southern Africa (2).  
58 Currently, Uganda ranks sixth globally among countries with the highest burden of new HIV  
59 infections, behind South Africa, Nigeria, Tanzania, Mozambique, and Kenya. In Uganda,  
60 young people, especially adolescent girls and young women, continue to be disproportionately  
61 affected by HIV, accounting for over one-third of new HIV infections (3). To control the spread  
62 of HIV, a number of policies and HIV prevention programs have previously been designed,  
63 passed and implemented. These include ABC (Abstinence, Being Faithful, and Condom use),  
64 voluntary counseling and testing, access to anti-retroviral therapy (ART) for PLWH, and  
65 integration of HIV/AIDS issues in teaching, research, and service activities (4).

66

67 However, in a report by Uganda AIDS Commission (UAC), it was noted that there were  
68 insufficient efforts to address challenges with scaling of HIV prevention methods. The shortage  
69 of efforts to address structural issues (such as gender and economic inequalities and stigma)  
70 and behavior change interventions (such as community-based behavioral prevention and age-  
71 appropriate sex education) contribute to the burden of new HIV infections in the country (3).  
72 Among other populations, a number of barriers to the utilization of HIV prevention methods  
73 have been identified. A previous study among adolescents and young adults living with HIV

74 in Uganda reported that stigma, fear of HIV disclosure, fear of anti-retroviral therapy (ART)  
75 side effects, long waiting times, and low economic status were established as barriers to the  
76 utilization of HIV care services (5). Among female sex workers in Uganda, stigma and  
77 economic status, breach of confidentiality, and stockout of drugs were described as barriers to  
78 the utilization of HIV prevention and care services (6).

79  
80 The incidence of HIV is known to be higher in key populations such as the youth and fishing  
81 communities, which comprise the greater proportion of the district in which this study was  
82 done. Of note, the youth may be aware of the existence of some of these HIV prevention  
83 services, but myths and barriers may affect their utilization (7). Whether the aforementioned  
84 barriers are the same among youth in and out of school is questionable. Additionally, it has  
85 previously been noted that HIV prevention services are mostly focused on urban hotspots in  
86 the country where new infections are expected, leaving out rural areas (3). Therefore, this study  
87 explored the barriers to the utilization of HIV prevention methods and established  
88 recommendations by stakeholders such as youth, health workers, and teachers to improve the  
89 utilization of HIV prevention methods in rural southwestern Uganda.

90

## 91 **Materials and Methods**

### 92 **Study design and setting.**

93 The study followed a descriptive approach, employed qualitative methods and was focused on  
94 exploring barriers and recommendations to the utilization of HIV prevention services among  
95 youth in rural South Western Uganda. The study site, Rubirizi district was chosen because it  
96 has the second highest prevalence of HIV among the youth in Uganda and the district has  
97 numerous finishing villages, which are a key HIV population. Particularly, a previous study  
98 indicated that HIV prevalence among the fishing communities in Uganda is estimated to be

99 three times that of the general population (8). It was therefore imperative that barriers to the  
100 utilization of HIV prevention services and possible solutions are extensively explored in such  
101 communities. The study included Focus Group Discussions (FGDs), in-depth interviews (IDIs)  
102 and key informant interviews (KIIs).

103

#### 104 **Ethics approval and consent to participate**

105 Prior to data collection, the study protocol was reviewed by Mbarara University of Science and  
106 Technology Research Ethics Committee (MUST-2021-291) for ethical clearance (Copy of  
107 MUST Research Ethics Committee Approval attached as S1). Administrative clearance was  
108 obtained from the Chief Administrative Officer (CAO) and the District Health Officer (DHO)  
109 of Rubirizi District. Following administrative clearance, permission to carry out the study was  
110 obtained from the head teachers of the different schools for the school going youth. The study  
111 participants were then approached and study procedures explained before being asked to  
112 participate in the study. Prior to data collection, written informed consent was obtained from  
113 each participant older than 18 years; and assent was obtained from all study participants less  
114 than 18 years as well as informed consent from their guardians for those outside school and by  
115 the head teachers for those who were in school. Anonymity was ensured by not collecting  
116 participants' personal identifying information throughout the study.

#### 117 **Study population.**

118 The study population included school and non-school-going youth aged 15 to 24 years  
119 regardless of their HIV status. The study also included teachers in-charge of health in schools,  
120 Village Health Team members (VHTs) or lay health workers and health workers directly  
121 involved in HIV care and treatment at the different health facilities. The key informants in this  
122 study were the district focal person for HIV/AIDS, District Health Officer (DHO), District  
123 Education Officer (DEO) and the District Community Development Officer (DCDO).

124

125 **Selection criteria**

126 All youth in Rubirizi district aged 15-24 years were eligible for the study. Health care workers  
127 at the HIV/AIDS clinic at the health centres in Rubirizi district and teachers in schools in  
128 Rubirizi district were also eligible. However, participants that did not give informed consent  
129 were excluded.

130

131 **Sample selection and data collection procedure.**

132 Following administrative clearance from the district leaders and head teachers, youth and  
133 teachers were recruited from mixed conveniently selected government/public schools in  
134 Rubirizi district including; Ndekye Senior Secondary School, Ryeru Seed School and Unique  
135 high school. Youth that were not in school were recruited using snowballing with the help of  
136 VHTs from purposively selected villages in the district.

137

138 In order to explore the barriers to utilization of HIV prevention services and suggest possible  
139 recommendations, Focus Group Discussions (FGDs) were held with both youth in school and  
140 those who were not in school. FGDs were held until there was no new information emerging  
141 from the discussions. A total of Six FGDs were held including 3 FGDs with youth in school  
142 and 3 FGDs with youth who were not in school. Each FGD in schools consisted of 8  
143 participants that were randomly picked from all the classes with the help of teachers.  
144 Participants aged above 18 years were consented before the discussion whereas participants  
145 aged less than 18 years were assented following consent from the headteacher.

146

147 The FGD and interview guides were developed by the authors, aligned with the study  
148 objectives and modified to fit the study setting. The FGDs were carried out in a quiet

149 environment in the school/church compounds. Questions in the FGD guide probed participants  
150 on their awareness of HIV preventive measures, and barriers to their utilization they had  
151 identified and explored possible recommendations. Each participant was given a unique  
152 identifying number to ensure confidentiality, and the discussions were audio recorded with one  
153 of the research assistants simultaneously taking notes. Youth that were not in school were  
154 selected using snowballing and FGDs were formed. Discussions were carried out at designated  
155 places like home to one of the participants or home to a VHT. FGDs lasted 45-60 minutes and  
156 participants were given refreshments and transport reimbursement at the end of the discussion.

157  
158 Three individual in-depth interviews were held with three teachers, from each of the three  
159 schools, three with VHTs, and three with health workers that work in HIV clinics. These  
160 interviews were carried out in a private environment after obtaining informed consent from the  
161 participants and lasted 45-60 minutes. The guide for the interviews was also developed by the  
162 research team. The interviews were mainly focused on the barriers to the utilization of HIV  
163 prevention services by the youth and suggestions of possible recommendations to overcome  
164 these barriers.

165  
166 Four key informant interviews were held individually with the District Health Officer, the  
167 District Community Development Officer, District Education Officer, and the district focal  
168 person for HIV. These informants were purposively selected because of their comprehensive  
169 understanding of the youth and their key positions in handling HIV services among the youth.  
170 The Key Informant Interviews were done at their respective offices following informed consent  
171 was obtained and each lasted about 1 hour. The data collection exercise was conducted starting  
172 from 7<sup>th</sup> March 2022 to 29<sup>th</sup> April 2022.

173

174 **Data management and analysis.**

175 All interviews were recorded and notes were taken by research assistants. Each recording was  
176 then transcribed verbatim in Runyankole, the local dialect before being translated into English  
177 by independent research assistants. The interviews/discussions conducted in English were  
178 transcribed verbatim. Each member of the research team then familiarized themselves with all  
179 the data through independent reading of each transcript. To ensure inter-coder reliability, the  
180 researchers met and inductively generated codes from the transcripts. These codes were  
181 imported into Nvivo (QSR International) software to generate a codebook. The codes were  
182 abstracted into subthemes which were fitted into the deductively generated main thematic  
183 categories; barriers to utilization of HIV preventive services and recommendations. This study  
184 followed a framework developed by Levesque et al (9).

185

186 **Results**

187 Table 1 presents the profile of study participants stratified according to the data collection  
188 method used. There were six Focus Group Discussions (3 with youth in school, 3 with youth  
189 out of school), nine in-depth interviews (3 with teachers, 3 with VHTs, 3 with health workers)  
190 and four key informant interviews (District Health Officer, District Community Development  
191 Officer, District Education Officer, District focal person for HIV) were held.

192 **Table 1: Profile of the study participants**

| <b>Data collection</b>                              | <b>NUMBER</b> |
|-----------------------------------------------------|---------------|
| <b>Key Informant Interviews participants (KIIs)</b> | <b>4</b>      |
| <i>Position</i>                                     |               |
| District Health Officer                             | 1             |
| District Education Officer                          | 1             |
| District HIV Focal Person                           | 1             |
| District Community Development Officer              | 1             |



|                                       |          |
|---------------------------------------|----------|
| <b>In-depth Interviews</b>            | <b>9</b> |
| <i>Position</i>                       |          |
| Teachers in-charge of Health          | 3        |
| Clinical Officer                      | 1        |
| ART in-charge                         | 1        |
| Village Health Team members           | 3        |
| Antenatal Nursing Officer             | 1        |
| <b>Focus Group Discussions (FGDs)</b> | <b>6</b> |
| <i>Youths</i>                         |          |
| Youth in School (YIS)                 | 24       |
| Youth out of School (YOS)             | 24       |

193

194 **Table 2** presents the participant characteristics for the FGDs and interviews. There were 48  
 195 youths who participated in six FGDs. There was an equal number of females and males and an  
 196 equal number of those in and out of school. The majority of the youth had attained primary  
 197 education. For the interview participants (key informants, in-depth) nine were male while 4  
 198 were female and the majority (10/13) had attained graduate and postgraduate educational  
 199 qualifications.

200 **Table 2: Participant characteristics for Focus Group Discussions & Interviews**

|                       | <b>FGDs (n=48)</b> | <b>KII &amp; In-depth interviews (n=13)</b> |
|-----------------------|--------------------|---------------------------------------------|
| <i>Characteristic</i> |                    |                                             |
| <b>Gender</b>         |                    |                                             |
| Male                  | 24                 | 9                                           |
| Female                | 24                 | 4                                           |
|                       |                    |                                             |
| Youth in school       | 24                 | -                                           |
| Youth out of school   | 24                 | -                                           |
| <b>Marital status</b> |                    |                                             |

|                                |    |   |
|--------------------------------|----|---|
| Married                        | 21 | 9 |
| Not married or divorced        | 27 | 4 |
|                                |    |   |
| <b>Highest education level</b> |    |   |
| None                           | 6  | 1 |
| Primary                        | 35 | 1 |
| Secondary                      | 5  | 1 |
| College/University             | -  | 6 |
| Postgraduate Education         | -  | 4 |
|                                |    |   |
| <b>Religious affiliation</b>   |    |   |
| Catholic                       | 31 | 7 |
| Anglican                       | 12 | 6 |
| Pentecostal                    | 1  | - |
| Seventh Day Adventist          | 1  | - |
| Muslim                         | 3  | - |
|                                |    |   |
| <b>Occupation</b>              |    |   |
| Student                        | 24 |   |
| Self employed                  | 4  | 1 |
| Subsistence farmer             | 2  | 1 |
| None                           | 16 | 3 |
| Other                          | 2  | 8 |

201

202 **Barriers to the utilization of HIV prevention services among youth**

203 From the interviews and discussions with the youth, health workers, and teachers, a number of  
204 barriers to the utilization of HIV preventive services were explored. This study defines barriers  
205 as any factor that hinders youth utilization of HIV preventive services. The barriers were  
206 stratified into individual, community, and health system barriers.

### 207 **Individual-level barriers to the utilization of HIV prevention services**

208 Three individual-level barriers to the utilization of HIV prevention services were identified.  
209 These included ignorance and misconceptions about HIV prevention services, fear of testing,  
210 low perceived susceptibility to HIV, and fear of breach of confidentiality.

### 211 **Ignorance and misconceptions towards HIV prevention services**

212 It was noted during the discussions with the youth that a knowledge gap and false beliefs held  
213 about some methods of HIV prevention especially condom use played a big role in their under-  
214 utilization of these specific methods. One of the youths that was not in school had this to say:

215 *“Even girls don’t want boys to use condoms when having sex for the fear that they don’t get*  
216 *sexual pleasure, that the boy may not put it on well and it enters deep in their vagina and cause*  
217 *vaginal cancer. All the above prejudices can’t let them use condoms which results into easy*  
218 *spread of HIV/AIDS among the youth” YOS FGD3 number6, 03/2022*

219 Surprisingly, even the youth in school also shared the same thoughts.

220 *“so that’s why I am saying that the use of condoms at some times its dangerous because you*  
221 *may find instantly or carelessly and you find that it has gone into the vagina then at times you*  
222 *are forced to go to the hospital to remove it or you find that you are forced to get cancer” YIS*  
223 *FGD1 number8,03/2022*

### 224 **Fear of testing for HIV among the youth**

225 This was highlighted as an important barrier to HIV testing as a method of HIV prevention.  
226 The youth expressed fear of what comes after getting positive test results and therefore  
227 preferred to remain in the dark about their status.

228 *“I told her and I advised her why can't you go for testing she refused telling me that if it were*  
229 *you, you can fear. After I forced her and went with her in the hospital, and we found that she*  
230 *had HIV. After she started.... she refused even take tablets and she ended up dying.....” YIS*  
231 *FGD2 number7, 03/2022*

232 *“she told me that she is not feeling okay. Then after we had to say. Do you know what you're*  
233 *going to do you go at the hospital and test for HIV but besides she feared there[hospital]...” YIS*  
234 *FGD3 number7, 03/2022*

235 *“the youth asked me that ‘if you find that I am HIV positive, what would you do to me and I*  
236 *said that I will declare the results to you and she said that if you find that I am HIV positive,*  
237 *don't give me the result slip that is positive. Give the result slip that is HIV negative because*  
238 *my parents are going to ask me’ ....so they are in that dilemma that when they are tested*  
239 *positive, it will be hard for them” IDI HW02, 03/2022*

#### 240 **Low perceived susceptibility to HIV**

241 It was evident during the discussions that some of the youth thought that they could not be  
242 affected by HIV which directly translated into under-utilization of the preventive services

243 *“The reason why some youth deep in the village don't test for HIV is that some of them are*  
244 *very proud of themselves. They just say that me to acquire HIV! No...they just have that*  
245 *feeling” YIS FGD1 number1, 03/2022*

246 *“Majority of the youth take AIDS for granted and by the time they find that they have HIV, it*  
247 *rises stigma in them and fears to take tablets” YIS FGD2 number5, 03/2022*

#### 248 **Fear of breach of confidentiality by health workers**

249 The youth reported that some health workers inform the rest of their community each time  
250 someone tests positive which stops them from accessing testing services or even going for  
251 counseling about HIV preventive services.

252 “...some youths don’t go to test for HIV because workers there at the health Centers when you  
253 go to test and you find that your HIV positive, they spread rumors that this one is positive,  
254 hence affecting you” YIS FGD1 number2, 03/2022

255

### 256 **Community level barriers to utilization of HIV prevention services**

257 At the community level, three barriers to utilization of HIV prevention services emerged during  
258 the discussions and teachers with youth and teachers in charge of health in schools. These were  
259 lack of counseling services in the communities, peer influence and stigma towards HIV.

### 260 **Lack of counseling services in the schools and community**

261 Counseling services are an effective way of passing on information to the youth about HIV and  
262 guiding the youth on the use of HIV preventive measures. However, the youth cited that there  
263 was limited availability of counseling services both in the schools and the community.

264 “For me, I can’t lie, we don’t have those laws in our school and counseling services” YIS  
265 FGD2 number3, 03/2022

266 Whereas other informants felt that counseling services were not readily available in the  
267 communities or schools they were available at health centers.

268 “We normally do general counseling and also come to them directly for those youth living with  
269 HIV (YLHIV), so they end up picking clear messages and go to health centers for example  
270 Rugazi health center four and easily get medication from there with or without us unlike those

271 *ones in the villages who have nobody to counsel them, talk to them and many others” IDI T01,*  
272 *03/2022*

273 *“We don’t have any counseling services in our villages. Though if you find them at the nearby*  
274 *health centers, health workers can counsel you” YOS FGD3 number2, 03/2022*

275 Additionally, some teachers also felt that they were not well trained to handle HIV counseling

276 *“No, we don’t do it, but basically, we do it on other diseases but not on HIV because of AIDS*  
277 *needs a trained counselor since us, we are used of punishing them, they may fear us to tell us*  
278 *most of the problems” IDI T02, 03/2022*

### 279 **Peer influence**

280 It was reported that peer influence affects the utilization of specific HIV preventive services by  
281 the youth.

282 *“Then another reason why some youths don’t go to test for HIV is because of peer group*  
283 *influence. You’re my friend then I ask you why you go to test for HIV? there is nothing wrong*  
284 *with you and you can’t go to test for HIV” YIS FGD1 number1, 03/2022*

285 *“Some youth wait to see others going to test for HIV/AIDS so that they can also go there.*  
286 *Therefore, if their fellows don’t go for HIV testing, they can’t go there as well” YOS FGD3*  
287 *number2, 03/2022*

### 288 **Stigma towards HIV**

289 The stigmatization that comes with testing positive from the community members, hinders  
290 utilization of most of these services.

291 *“Another thing is that stigma remains still a problem and because of this pandemic that have*  
292 *been there, it has put the youth on the high risk of acquiring HIV because there has been*

293 *redundancy among youth and yet since they fear to be seen at the health facility ...” IDI HW02,*  
294 *03/2022*

### 295 **Health system barriers**

296 Lack of youth-friendly services emerged as the only health system barrier to the utilization of  
297 these services.

### 298 **Lack of youth-friendly services**

299 The HIV services at health facilities were described as not being favorable for the youth and  
300 favorable thereby hindering their utilization by this age category.

301 *“And another thing is that most of our health facilities we don’t have youth friendly corners*  
302 *which means that we fail how to give youth services” IDI HW02, 03/2022*

303 *“Not at all because of two factors; one service and age go together because they also want*  
304 *their peer to serve them. So we are saying that it will be good if all health centers have a peer*  
305 *system especially office for the youth so that they know where they can meet their fellow youth*  
306 *and get services because it is still a general issue so there is still limited access of those youth*  
307 *out of school” KII 04, 03/2022*

308

### 309 **Recommendations for improving youth utilization of HIV prevention services.**

310 Study participants made several recommendations to overcome barriers preventing youth from  
311 utilizing HIV preventive services and these include; the formation of youth peer support  
312 groups, ongoing awareness campaigns, and socio-economic empowerment.

### 313 **Formation of youth peer support groups**

314 Respondents highlighted the need to involve youth leaders in HIV prevention programs at the  
315 community level as they are likely to encourage youth involvement and utilization of HIV

316 preventive methods. It was noted that these groups might make the mobilization of youth for  
317 HIV awareness campaigns easier for health workers to carry out.

318 *“I think there, they should use youth leaders in their community because they know themselves*  
319 *very well and prepare meetings and invite those medical workers to talk to them since most of*  
320 *the youth come from hard-to-reach areas that hinder them from getting services”*. IDI T02,  
321 *03/2022*

322 In addition, peer groups at the community level can also be employed at health facilities to  
323 work with health service providers in providing HIV services. The same groups of youth can  
324 be used at the community level to equip, encourage and provide guidance and counseling  
325 services to fellow youth as they seem to be more comfortable with their peers working on them.  
326 A health worker suggested,

327 *“We should also establish youth peer groups, and they work with us at the health facility and*  
328 *in the community because it is easy for a peer to encounter the youth at the village level.”* IDI  
329 *HW02, 03/2022*

330 Importantly, since youths were reported to be more comfortable being handled by fellow youth,  
331 training, and creation of youth teams that do work similar to that of the village health team  
332 members, but for their peers specifically was likely to get more youth involved in HIV  
333 campaigns. A key informant implied,

334 *“We should have community workers for the youth at the village level, not the VHTs. We should*  
335 *have mobile youth health workers for the youth, train them, and give them what is necessary*  
336 *like vehicles, Laptops, testing kits, CDS and move in the community to give services to the*  
337 *fellow youths in a humble way”*. KII 04, 03/2022

338 **Ongoing awareness campaigns.**



339 In line with the decentralization of health services to the lowest level in the community, some  
340 respondents reported that it was imperative to extend HIV prevention services to villages as  
341 some youths were less likely to seek such services that were only provided at parish levels and  
342 higher levels. Furthermore, it is also essential to include people from different campaigns while  
343 teaching about HIV preventive measures, as youth are less likely to listen to people they are  
344 used to seeing in the same locality. A member of the village health team stated,

345 *“I suggest that HIV education should be done at the village level because if it remains in the*  
346 *parish, the majority of the youth don’t even go there, and we should normally have new faces*  
347 *during that education because if they see us educating them, they don’t take it seriously because*  
348 *they are used to us.” IDI VHT02, 03/2022*

349 Furthermore, Village Health Teams can be tasked to create relationships with the school  
350 administrations to give students more information about different methods of protection against  
351 HIV infection. In addition, this would make it easier for them to engage these youth out of  
352 school. This was proposed by a member of a village health team who stated,

353 *“For me, I think there should be a strong partnership between VHTs and schools so that we*  
354 *can educate the youth both at the school and out of school on how they should protect*  
355 *themselves from HIV/AIDS.” IDI VHT03, 03/2022*

### 356 **Socio-economic empowerment.**

357 To address poverty-afflicted non-school-going youth, it is essential to equip these young people  
358 with skills like carpentry, welding, and hairdressing. This could encourage them to start  
359 income-generating activities to take charge of their lives instead of seeking help from older  
360 adults that are likely to take advantage of them. A key informant suggested,

361 *“Economic empowerment if we can start some good programs that focus on youth like skilling.*  
362 *Yes, the youth could have left school at an early age, but they have hands, and they can go for*

363 *saloons, carpentry, welding, and many others. So, they can be supported so they can get*  
364 *something to survive on other than depending on support from the non-related parents”. KII*  
365 *04, 03/2022*

366 Also, a health worker stated,

367 *“For those non-school going youth if they can be given income generating activities so that this*  
368 *system of going to the adult people yet they may be infected, so if they are given income*  
369 *generating activities, they may not go to seek for money from the older people.” IDI HW02,*  
370 *03/2022*

371

## 372 **Discussion**

373 The main objective of this study was to explore barriers to the utilization of HIV prevention  
374 services among youth aged 15-24 years in rural southwestern Uganda and establish  
375 recommendations to improve the utilization of these services. These barriers were categorized  
376 into individual barriers (ignorance and misconceptions about the services, fear of testing, low  
377 perceived susceptibility to HIV, and fear of breach of confidentiality), community barriers  
378 (lack of counseling services in the communities, peer influence, and stigmatization), and a  
379 health system barrier (lack of youth-friendly services). Three main recommendations were  
380 established including the formation of youth peer support groups, ongoing awareness  
381 campaigns, and socio-economic empowerment.

382 It emerged that the youth held misconceptions and false beliefs about certain HIV prevention  
383 methods, especially the use of condoms, which negatively affected their utilization of these  
384 services. These misconceptions arose during discussions with both the youth in school and the  
385 youth out of school. Our findings are similar to those among adolescents in Nigeria (10) who  
386 also held a number of misconceptions are common about condom use. A possible explanation

387 for these misconceptions is a lack of guidance from adults and parents. Therefore, it is likely  
388 that the youth will get information from their peers who may not be well-informed on HIV  
389 prevention services.

390 HIV Testing Services (HTS) has been described as an essential gateway to HIV prevention  
391 because early linkage to ART can prevent HIV transmission to one's partner and prevent  
392 vertical transmission (11). Additionally, knowledge of one's status makes one more to choose  
393 an effective HIV prevention method. In this study, it was identified that the fear of testing  
394 positive affected the youth's utilization of HTS. This may be due to the associated stress that  
395 comes with testing positive as reported in a previous study conducted among refugee  
396 adolescents and youth in Kampala Uganda (12). Additionally, the fear of testing could be due  
397 to the fear of being ostracized from the community (perceived stigma) which was also reported  
398 as a barrier to the utilization of these HIV prevention services in this population. Due to the  
399 fact that fear of testing is rooted in stigma (13), we suggest stigma reduction campaigns  
400 especially targeting the youth in rural communities. This is important because increased  
401 awareness has been reported to lead to changes in stigmatizing attitudes and an increase in HIV  
402 testing (14). Additionally, we recommend widespread implementation of HIV self-testing  
403 (HIVST), especially in this age group. Previously, HIVST has been reported to increase the  
404 uptake and frequency of testing for youth and may tackle the challenge of fear of testing in this  
405 youth age group (15–17).

406 Low perceived risk of susceptibility to HIV was identified as a barrier to the utilization of  
407 certain HIV prevention services especially HIV testing and condom use. One's perception of  
408 their susceptibility to HIV infection is very important because it affects one's likelihood of  
409 getting involved in risky sexual behavior such as not using a condom (18). However, our  
410 findings are different from those of a quantitative study done in 2004 among adolescents in  
411 Uganda that found most female adolescents to have a high perceived risk of susceptibility to

412 HIV (19). However, this study used data from 2004, a period during which the mortality rate  
413 due to HIV was high, and HIV was therefore highly feared and the risk of susceptibility  
414 possibly higher. To address this low perceived risk, this youth population may therefore benefit  
415 from continuous awareness campaigns on the dangers of HIV.

416 This study also found that a shortage of counseling services in schools and communities  
417 affected the utilization of HIV prevention services. The study participants reported that these  
418 services are only at specific health facilities rather than at a more decentralized level (like  
419 villages) which isn't accessible to all. Additionally, teachers expressed the lack of skills in HIV  
420 counseling to guide students on the utilization of some of these HIV prevention methods.  
421 Comprehensive Sexuality Education (CSE) has previously been suggested as a modality to  
422 deliver information on sexual and reproductive health to adolescents and youth in schools (20).  
423 However, it is emerging that teachers in rural schools may not have the skills to deliver CSE.  
424 This is possibly due to the recent changes in CSE beyond abstinence-only education (21).  
425 Therefore, we recommend the implementation of school-based CSE training for teachers,  
426 especially in rural areas that have been postulated to increase awareness of sexual and  
427 reproductive health (22).

428 We found that peer influence is one of the barriers to the utilization of HIV preventive  
429 measures. This is because the youth reported dependence on the opinions of their counterparts  
430 to guide their choice (or not) of usage of specific HIV preventive methods. This highlights the  
431 need to increase focus on peer education as an intervention to improve the uptake of HIV  
432 prevention services. The formation of peer groups typically involves recruiting members of a  
433 specific at-risk group to encourage members to change risky sexual behaviors and maintain  
434 healthy sexual behaviors (23). Peer education is documented to enhance interpersonal  
435 interaction allowing for more open discussions on sensitive topics such as sexuality (24). Peer

436 education also tackles the challenge of health workers not being in a position to reach them  
437 (22).

438 Health workers also reported that the lack of youth-friendly services at rural health facilities  
439 affected the youth's utilization of HIV prevention services. This lack of youth-friendly services  
440 has also been reported in a recent systematic review (25) on access and utilization of youth-  
441 friendly sexual and reproductive health services in sub-Saharan Africa. This review reported  
442 that the negative attitude and the lack of skills among health workers were some of the barriers  
443 to the implementation of youth-friendly services. Therefore, health workers may benefit from  
444 continuous training to equip them with the skills to provide youth-friendly services.  
445 Additionally, as has been suggested previously (26), youth in rural areas should be actively  
446 involved in the design and implementation of sexual and reproductive health services in order  
447 to ensure that they are youth-friendly. Finally, it has been suggested that HIV prevention  
448 services should be made as affordable as possible to ensure their utilization by the youth (25).

449 Three recommendations were reported by the stakeholders to address the noted barriers to the  
450 utilization of HIV prevention services. First and foremost, the need for ongoing HIV prevention  
451 awareness campaigns in rural communities. These awareness campaigns should be  
452 strategically targeted toward the youth and family structures at the village level and in the  
453 different schools. This is important because parents can be better informed to guide their  
454 children on the usage of different HIV prevention methods. These public awareness campaigns  
455 have been documented to influence behavior change and encourage openness, especially  
456 among the youth (27). Intensification of the campaigns should be directed towards providing  
457 information on different HIV prevention methods, especially novel methods like pre and post-  
458 exposure prophylaxis, and also addressing previously identified common myths and  
459 misconceptions (28) about the different HIV prevention methods as identified by the study  
460 participants.

461 Another recommendation was the establishment of youth peer groups in rural communities.  
462 Peer support has been described to buffer the negative effects of stigma and positively influence  
463 behavior (29). As aforementioned the youth are more likely to approach peers for HIV-related  
464 information as compared to adult healthcare workers. These peer groups could also play a role  
465 in ensuring sexual and reproductive health services at the community level are youth-friendly  
466 It has been noted that for sexual and reproductive health services to be youth-friendly, the youth  
467 should play a role in their design and implementation (22). These groups could support the  
468 dissemination of information on HIV prevention methods to the youth of these HIV prevention  
469 services. However, the implementation and scale-up of these peer support services have been  
470 affected by insufficient funding and coordination in sub-Saharan Africa (30). Therefore, this  
471 needs to be explored by the different stakeholders and policymakers.

472 Finally, economic empowerment was a recommendation given by health workers and district  
473 officials to help control the spread of HIV among the youth. As aforementioned, adolescent  
474 girls and young women that are at the highest risk for HIV (3). Therefore, HIV prevention  
475 interventions that include economic empowerment activities are particularly beneficial in low-  
476 resource settings, where adolescent girls and young women are at increased risk of engaging  
477 in transactional and cross-generational sex due to limited economic assets (31,32). Previously  
478 described economic empowerment interventions include microfinance, vocational skills  
479 training, business development training, and micro-enterprise development (33,34). Economic  
480 empowerment has been documented to have the potential to address other sexual and  
481 reproductive health challenges such as domestic violence by giving young women the  
482 economic independence to leave abusive relationships (35). Our findings highlight the need to  
483 actively scale up economic empowerment, especially in rural areas as a long-term mitigation  
484 strategy for the management of HIV spread.

485 One strength of this study is that all study participants were purposively selected from district  
486 administrative officials, teachers, healthcare workers, and youth (both those in and out of  
487 school). This mix of participants allowed the study team to explore the discussed barriers and  
488 recommendations to improve the utilization of HIV prevention services from different  
489 perspectives. The in-depth interviews done with healthcare workers and teachers allowed for  
490 an in-depth examination and a better understanding of the various barriers earlier explored. All  
491 interviews and discussions were moderated by research assistants who had no attachment to  
492 the school, health facility, or community, and therefore the participants could freely discuss  
493 during the interviews. Additionally, uniform study guides for the respective participant groups  
494 were used throughout the interviews and discussions to ensure the validity of the collected  
495 information. The main limitation of this study is that barriers were explored from a small youth  
496 population, therefore there's a need to do quantitative studies to identify barriers to utilization  
497 with the largest magnitude to guide the prioritization of interventions by the different  
498 policymakers and stakeholders.

## 499 **Conclusion**

500 The youth remain a key population in the struggle against HIV, and this study highlighted  
501 barriers to the utilization of HIV prevention services among youth in rural southwestern  
502 Uganda. These barriers were stratified at different levels including individual barriers  
503 (ignorance and misconceptions about the services, fear of testing, low perceived susceptibility  
504 to HIV, and fear of breach of confidentiality), community barriers (lack of counseling services  
505 in the communities, peer influence, and stigma towards HIV), and a health system barrier (lack  
506 of youth-friendly services). Additionally, three main recommendations were highlighted by the  
507 study participants that is, formation of youth peer support groups, ongoing awareness  
508 campaigns, and socio-economic empowerment. Some of the highlighted barriers (such as low  
509 perceived susceptibility to HIV) need to be further explored by researchers and other relevant

510 stakeholders to develop a deeper understanding of their origins and possible solutions.  
511 Suggestions like nationwide scaling of youth peer support services have the potential to address  
512 specific barriers like stigma and improve uptake of specific HIV prevention methods. These  
513 findings highlight the need for concerted efforts from policymakers especially the government  
514 of Uganda to support the fight against HIV in rural areas and work towards ending the HIV  
515 epidemic by 2030.

516

#### 517 **Declarations**

#### 518 **Consent for publication**

519 Not applicable

#### 520 **Availability of data and materials**

521 The datasets generated and/or analysed during the current study are not publicly available due  
522 to ethical reasons but are available from the corresponding author on reasonable request.

#### 523 **Competing interests**

524 The authors declare no competing interest.

#### 525 **Funding**

526 Research reported in this publication was jointly supported by the Fogarty International Center  
527 (U.S. Department of State's Office of the U.S. Global AIDS Coordinator and Health  
528 Diplomacy [S/GAC] and the President's Emergency Plan for AIDS Relief [PEPFAR]) of the  
529 National Institutes of Health under Award Number R25TW011210 and Mbarara University of  
530 Science and Technology. The content is solely the responsibility of the authors and does not  
531 necessarily represent the official views of the National Institutes of Health and Mbarara  
532 University of Science and Technology.

#### 533 **Authors' contributions**



534 PWS, IK, CO, and JKK conceptualized the study with TMK, AKN, RN, EKW, and MA  
535 participating in its design. PWS, IK, TMK, and JKK participated in the collection of data. Data  
536 entry and merging were done by PWS, IK, RN, and MA. PWS, TMK, TK, AKN and RN  
537 analyzed the data; with PWS, TK and TMK working together to come out with the first draft  
538 of the manuscript. AKN, RN MA, EKW, CO, and JKK then read and provided critical feedback  
539 on the manuscript. All authors approved the final manuscript.

#### 540 **Acknowledgments**

541 The authors also acknowledge the parents, guardians, teachers, and head teachers of the  
542 participating secondary schools for their contribution to the data collected in this study. The  
543 authors gratefully acknowledge Robens Mutatina (RM), Edson Byamugisha (EB) and Justine  
544 Kemigisha (JK) the Research Assistants who fully participated in the collection of the data.

545

546

#### 547 **References**

- 548 1. World Health Organization. HIV/AIDS: Framework for action in the WHO African  
549 Region, 2016-2020 [Internet]. 2017 [cited 2022 Jan 11]. Available from:  
550 <https://apps.who.int/iris/bitstream/handle/10665/259638/EndAIDS-eng.pdf;sequence=1>
- 551 2. UNAIDS. UNAIDS FactSheet 2022.pdf [Internet]. 2022 [cited 2022 Jan 11]. Available  
552 from: [https://www.unaids.org/sites/default/files/media\\_asset/UNAIDS\\_FactSheet\\_en.pdf](https://www.unaids.org/sites/default/files/media_asset/UNAIDS_FactSheet_en.pdf)
- 553 3. Uganda AIDS Commission. ACCELERATION OF HIV PREVENTION IN UGANDA: A  
554 road map towards zero new infections by 2030.pdf [Internet]. 2018 [cited 2022 Jan 11].  
555 Available from: [https://uac.go.ug/media/attachments/2021/12/08/prevention-road-map-  
556 final.pdf](https://uac.go.ug/media/attachments/2021/12/08/prevention-road-map-final.pdf)
- 557 4. Ndabarora E, Mchunu G. Factors that influence utilisation of HIV/AIDS prevention  
558 methods among university students residing at a selected university campus. SAHARA-J:  
559 Journal of Social Aspects of HIV/AIDS [Internet]. 2014 Jan 2 [cited 2022 Nov  
560 1];11(1):202–10. Available from:  
561 <http://www.tandfonline.com/doi/abs/10.1080/17290376.2014.986517>
- 562 5. Nakigozi G, Makumbi FE, Kigozi G, Nalugoda F, Reynolds SJ, Chang LW, et al. Barriers  
563 to Utilization of HIV Care Services Among Adolescents and Young Adults in Rakai,  
564 Uganda: the Role of Economic Strengthening. Glob Soc Welf [Internet]. 2015 Jun [cited  
565 2022 Nov 1];2(2):105–10. Available from: [http://link.springer.com/10.1007/s40609-015-  
566 0030-4](http://link.springer.com/10.1007/s40609-015-0030-4)

- 567 6. Ssekamatte T, Isunju JB, Naume M, Buregyeya E, Mugambe RK, Wanyenze RK, et al.  
568 Barriers to access and utilisation of HIV/STIs prevention and care services among trans-  
569 women sex workers in the greater Kampala metropolitan area, Uganda. *BMC Infect Dis*  
570 [Internet]. 2020 Dec [cited 2022 Nov 1];20(1):932. Available from:  
571 <https://bmcinfectdis.biomedcentral.com/articles/10.1186/s12879-020-05649-5>
- 572 7. Tenkorang EY. Myths and misconceptions about HIV transmission in Ghana: what are the  
573 drivers? *Culture, Health & Sexuality* [Internet]. 2013 Mar [cited 2022 Nov 1];15(3):296–  
574 310. Available from: <http://www.tandfonline.com/doi/abs/10.1080/13691058.2012.752107>
- 575 8. Opio A, Muyonga M, Mulumba N. HIV Infection in Fishing Communities of Lake  
576 Victoria Basin of Uganda - A Cross-Sectional Sero-Behavioral Survey. *PLoS ONE*.  
577 2013;8(8).
- 578 9. Levesque JF, Harris MF, Russell G. Patient-centred access to health care: conceptualising  
579 access at the interface of health systems and populations. *Int J Equity Health* [Internet].  
580 2013 [cited 2022 Nov 9];12(1):18. Available from:  
581 <http://equityhealthj.biomedcentral.com/articles/10.1186/1475-9276-12-18>
- 582 10. Mbachu CO, Agu IC, Obayi C, Eze I, Ezumah N, Onwujekwe O. Beliefs and  
583 misconceptions about contraception and condom use among adolescents in south-east  
584 Nigeria. *Reprod Health* [Internet]. 2021 Dec [cited 2022 Nov 1];18(1):7. Available from:  
585 [https://reproductive-health-journal.biomedcentral.com/articles/10.1186/s12978-020-](https://reproductive-health-journal.biomedcentral.com/articles/10.1186/s12978-020-01062-y)  
586 [01062-y](https://reproductive-health-journal.biomedcentral.com/articles/10.1186/s12978-020-01062-y)
- 587 11. UNAIDS. WHO, UNAIDS statement on HIV testing services: new opportunities and  
588 ongoing challenges [Internet]. 2017 [cited 2022 Jan 11] p. 8. Available from:  
589 [https://www.unaids.org/sites/default/files/media\\_asset/2017\\_WHO-](https://www.unaids.org/sites/default/files/media_asset/2017_WHO-UNAIDS_statement_HIV-testing-services_en.pdf)  
590 [UNAIDS\\_statement\\_HIV-testing-services\\_en.pdf](https://www.unaids.org/sites/default/files/media_asset/2017_WHO-UNAIDS_statement_HIV-testing-services_en.pdf)
- 591 12. Logie CH, Okumu M, Kibuuka Musoke D, Hakiza R, Mwima S, Kyambadde P, et al.  
592 Intersecting stigma and HIV testing practices among urban refugee adolescents and youth  
593 in Kampala, Uganda: qualitative findings. *J Intern AIDS Soc* [Internet]. 2021 Mar [cited  
594 2022 Nov 1];24(3). Available from:  
595 <https://onlinelibrary.wiley.com/doi/10.1002/jia2.25674>
- 596 13. Madiba S, Ralebona E, Lowane M. Perceived Stigma as a Contextual Barrier to Early  
597 Uptake of HIV Testing, Treatment Initiation, and Disclosure; the Case of Patients  
598 Admitted with AIDS-Related Illness in a Rural Hospital in South Africa. *Healthcare*  
599 [Internet]. 2021 Jul 29 [cited 2022 Nov 1];9(8):962. Available from:  
600 <https://www.mdpi.com/2227-9032/9/8/962>
- 601 14. Thapa S, Hannes K, Cargo M, Buve A, Peters S, Dauphin S, et al. Stigma reduction in  
602 relation to HIV test uptake in low- and middle-income countries: a realist review. *BMC*  
603 *Public Health*. 2018 Nov 20;18(1):1277.
- 604 15. Pettifor A, Lippman SA, Kimaru L, Haber N, Mayakayaka Z, Selin A, et al. HIV self-  
605 testing among young women in rural South Africa: A randomized controlled trial  
606 comparing clinic-based HIV testing to the choice of either clinic testing or HIV self-testing  
607 with secondary distribution to peers and partners. *EClinicalMedicine* [Internet]. 2020 Apr

- 608 [cited 2022 Nov 1];21:100327. Available from:  
609 <https://linkinghub.elsevier.com/retrieve/pii/S2589537020300717>
- 610 16. Johnson CC, Kennedy C, Fonner V, Siegfried N, Figueroa C, Dalal S, et al.  
611 Examining the effects of HIV self-testing compared to standard HIV testing services: a  
612 systematic review and meta-analysis. *Journal of the International AIDS Society* [Internet].  
613 2017 Jan [cited 2022 Nov 1];20(1):21594. Available from:  
614 <https://onlinelibrary.wiley.com/doi/10.7448/IAS.20.1.21594>
- 615 17. Koris AL, Stewart KA, Ritchwood TD, Mususa D, Ncube G, Ferrand RA, et al.  
616 Youth-friendly HIV self-testing: Acceptability of campus-based oral HIV self-testing  
617 among young adult students in Zimbabwe. Lebina L, editor. *PLoS ONE* [Internet]. 2021  
618 Jun 29 [cited 2022 Nov 1];16(6):e0253745. Available from:  
619 <https://dx.plos.org/10.1371/journal.pone.0253745>
- 620 18. Prata N, Morris L, Mazive E, Vahidnia F, Stehr M. Relationship Between HIV Risk  
621 Perception and Condom Use: Evidence from a Population-Based Survey in Mozambique.  
622 *IFPP* [Internet]. 2006 Dec [cited 2022 Nov 1];32(04):192–200. Available from:  
623 <http://www.gutmacher.org/pubs/journals/3219206.pdf>
- 624 19. Kibombo R, Neema S, Ahmed FH. Perceptions of risk to HIV infection among  
625 adolescents in Uganda: are they related to sexual behaviour? *Afr J Reprod Health*. 2007  
626 Dec;11(3):168–81.
- 627 20. SWEDISH INTERNATIONAL DEVELOPMENT COOPERATION AGENCY  
628 (SIDA). *Comprehensive Sexuality Education* [Internet]. 2016 [cited 2022 Jan 11].  
629 Available from: [https://cdn.sida.se/publications/files/sida61942en-comprehensive-](https://cdn.sida.se/publications/files/sida61942en-comprehensive-sexuality-educationfeb-2016.pdf)  
630 [sexuality-educationfeb-2016.pdf](https://cdn.sida.se/publications/files/sida61942en-comprehensive-sexuality-educationfeb-2016.pdf)
- 631 21. Boozalis JA, Nakibuule MH, Realini JP, Rosenfeld J. A new hope: introducing  
632 comprehensive sex education to a Christian secondary school in Uganda after repeal of  
633 parliamentary ban. *Journal of Global Health Reports* [Internet]. 2020 Apr 28 [cited 2022  
634 Nov 1];4. Available from: [https://www.joghr.org/article/12528-a-new-hope-introducing-](https://www.joghr.org/article/12528-a-new-hope-introducing-comprehensive-sex-education-to-a-christian-secondary-school-in-uganda-after-repeal-of-parliamentary-ban)  
635 [comprehensive-sex-education-to-a-christian-secondary-school-in-uganda-after-repeal-of-](https://www.joghr.org/article/12528-a-new-hope-introducing-comprehensive-sex-education-to-a-christian-secondary-school-in-uganda-after-repeal-of-parliamentary-ban)  
636 [parliamentary-ban](https://www.joghr.org/article/12528-a-new-hope-introducing-comprehensive-sex-education-to-a-christian-secondary-school-in-uganda-after-repeal-of-parliamentary-ban)
- 637 22. Geneva: Global HIV Prevention Coalition. The effectiveness of behavioural  
638 interventions to prevention HIV. A compendium of evidence [Internet]. 2017 [cited 2022  
639 Jan 11]. Available from: [https://hivpreventioncoalition.unaids.org/wp-](https://hivpreventioncoalition.unaids.org/wp-content/uploads/2019/09/The-effectiveness-of-behavioural-interventions-to-prevent-HIV.-A-compendium-of-evidence_final.pdf)  
640 [content/uploads/2019/09/The-effectiveness-of-behavioural-interventions-to-prevent-HIV.-](https://hivpreventioncoalition.unaids.org/wp-content/uploads/2019/09/The-effectiveness-of-behavioural-interventions-to-prevent-HIV.-A-compendium-of-evidence_final.pdf)  
641 [A-compendium-of-evidence\\_final.pdf](https://hivpreventioncoalition.unaids.org/wp-content/uploads/2019/09/The-effectiveness-of-behavioural-interventions-to-prevent-HIV.-A-compendium-of-evidence_final.pdf)
- 642 23. Webel AR. Testing a peer-based symptom management intervention for women  
643 living with HIV/AIDS. *AIDS Care* [Internet]. 2010 Sep [cited 2022 Nov 1];22(9):1029–  
644 40. Available from: <https://www.tandfonline.com/doi/full/10.1080/09540120903214389>
- 645 24. Simoni JM, Nelson KM, Franks JC, Yard SS, Lehavot K. Are Peer Interventions for  
646 HIV Efficacious? A Systematic Review. *AIDS Behav* [Internet]. 2011 Nov [cited 2022  
647 Nov 1];15(8):1589–95. Available from: [http://link.springer.com/10.1007/s10461-011-](http://link.springer.com/10.1007/s10461-011-9963-5)  
648 [9963-5](http://link.springer.com/10.1007/s10461-011-9963-5)

- 649 25. Ninsiima LR, Chiumia IK, Ndejjo R. Factors influencing access to and utilisation of  
650 youth-friendly sexual and reproductive health services in sub-Saharan Africa: a systematic  
651 review. *Reprod Health* [Internet]. 2021 Dec [cited 2022 Nov 1];18(1):135. Available from:  
652 [https://reproductive-health-journal.biomedcentral.com/articles/10.1186/s12978-021-](https://reproductive-health-journal.biomedcentral.com/articles/10.1186/s12978-021-01183-y)  
653 [01183-y](https://reproductive-health-journal.biomedcentral.com/articles/10.1186/s12978-021-01183-y)
- 654 26. Gage AJ, Do M, Grant D. Best Practices for Adolescent- and Youth-Friendly HIV  
655 Services – A Compendium of Selected Projects in PEPFAR-Supported Countries. 2017  
656 [cited 2022 Jan 11];221. Available from:  
657 <https://www.measureevaluation.org/resources/publications/tr-16-134/index.html>
- 658 27. Educational and Training Unit (ETU). HIV and AIDS CAMPAIGN GUIDE.pdf  
659 [Internet]. [cited 2022 Jan 11]. Available from:  
660 <https://www.etu.org.za/toolbox/docs/organise/webaids.html>
- 661 28. Letamo G. Misconceptions about HIV transmission among adolescents: levels, trends  
662 and correlates from the Botswana AIDS impact surveys, 2001–2013: A short report. *AIDS*  
663 *Care* [Internet]. 2019 Jan 2 [cited 2022 Nov 1];31(1):48–52. Available from:  
664 <https://www.tandfonline.com/doi/full/10.1080/09540121.2018.1488030>
- 665 29. Casale M, Boyes M, Pantelic M, Toska E, Cluver L. Suicidal thoughts and behaviour  
666 among South African adolescents living with HIV: Can social support buffer the impact of  
667 stigma? *Journal of Affective Disorders* [Internet]. 2019 Feb [cited 2022 Nov 1];245:82–90.  
668 Available from: <https://linkinghub.elsevier.com/retrieve/pii/S0165032717324898>
- 669 30. Mark D, Hrapcak S, Ameyan W, Lovich R, Ronan A, Schmitz K, et al. Peer Support  
670 for Adolescents and Young People Living with HIV in sub-Saharan Africa: Emerging  
671 Insights and a Methodological Agenda. *Curr HIV/AIDS Rep* [Internet]. 2019 Dec [cited  
672 2022 Nov 1];16(6):467–74. Available from: [http://link.springer.com/10.1007/s11904-019-](http://link.springer.com/10.1007/s11904-019-00470-5)  
673 [00470-5](http://link.springer.com/10.1007/s11904-019-00470-5)
- 674 31. Padian NS, McCoy SI, Karim SSA, Hasen N, Kim J, Bartos M, et al. HIV prevention  
675 transformed: the new prevention research agenda. *The Lancet* [Internet]. 2011 Jul [cited  
676 2022 Nov 1];378(9787):269–78. Available from:  
677 <https://linkinghub.elsevier.com/retrieve/pii/S0140673611608775>
- 678 32. Masanjala W. The poverty-HIV/AIDS nexus in Africa: A livelihood approach. *Social*  
679 *Science & Medicine* [Internet]. 2007 Mar [cited 2022 Nov 1];64(5):1032–41. Available  
680 from: <https://linkinghub.elsevier.com/retrieve/pii/S027795360600520X>
- 681 33. Kennedy CE, Fonner VA, O'Reilly KR, Sweat MD. A systematic review of income  
682 generation interventions, including microfinance and vocational skills training, for HIV  
683 prevention. *AIDS Care* [Internet]. 2014 Jun 3 [cited 2022 Nov 1];26(6):659–73. Available  
684 from: <https://www.tandfonline.com/doi/full/10.1080/09540121.2013.845287>
- 685 34. Swann M. Economic strengthening for HIV prevention and risk reduction: a review of  
686 the evidence. *AIDS Care* [Internet]. 2018 Jul 25 [cited 2022 Nov 1];30(sup3):37–84.  
687 Available from: <https://www.tandfonline.com/doi/full/10.1080/09540121.2018.1479029>
- 688 35. Stöckl H, Hassan A, Ranganathan M, M. Hatcher A. Economic empowerment and  
689 intimate partner violence: a secondary data analysis of the cross-sectional Demographic

690 Health Surveys in Sub-Saharan Africa. BMC Women's Health [Internet]. 2021 Dec [cited  
691 2022 Nov 1];21(1):241. Available from:  
692 <https://bmcmwomenshealth.biomedcentral.com/articles/10.1186/s12905-021-01363-9>  
693
